# Supplementary material for: Leucine Repeat Rich Kinase 1 Controls Osteoclast Activity by Managing Lysosomal Trafficking and Secretion
Source: Biology (Basel). 2023 Mar 29;12(4):511. doi: 10.3390/biology12040511 (PMC10135754; doi:10.3390/biology12040511)
Supplement: Supplementary file 1 [file biology-12-00511-s001.zip › biology-2280887-supplementary.pdf]

SM1

## Original Blot Images for Figure 3B

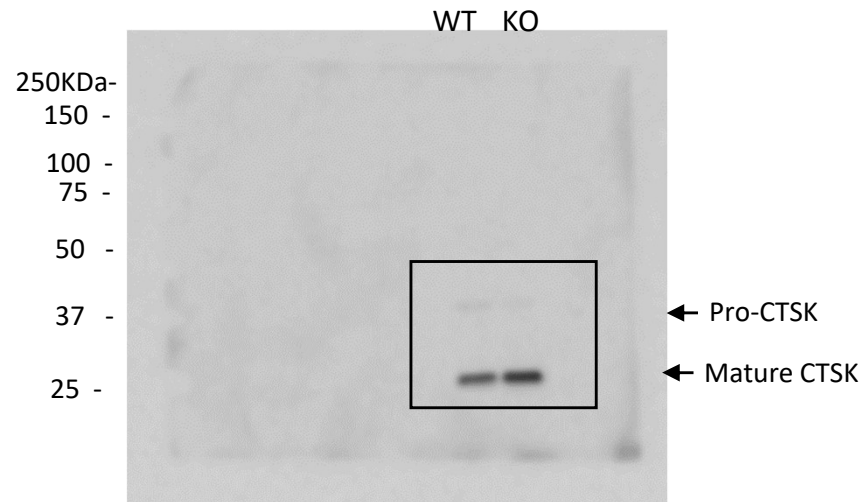

Blot to CTSK Ab  
(the 46kDa pro-CTSK and the 27kDa  
mature CTSK were detected)

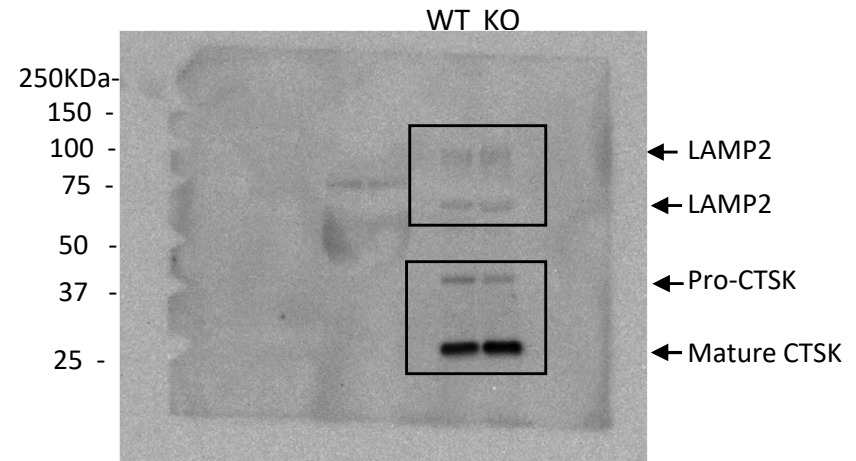

Blot to LAMP2 Ab after blotting to CTSK Ab  
( multiple bands of the glycosylated LAMP2  
around 70, 100-120kDa were detected)

SM2

Original Blot Images for Figure 3B  
(continue)

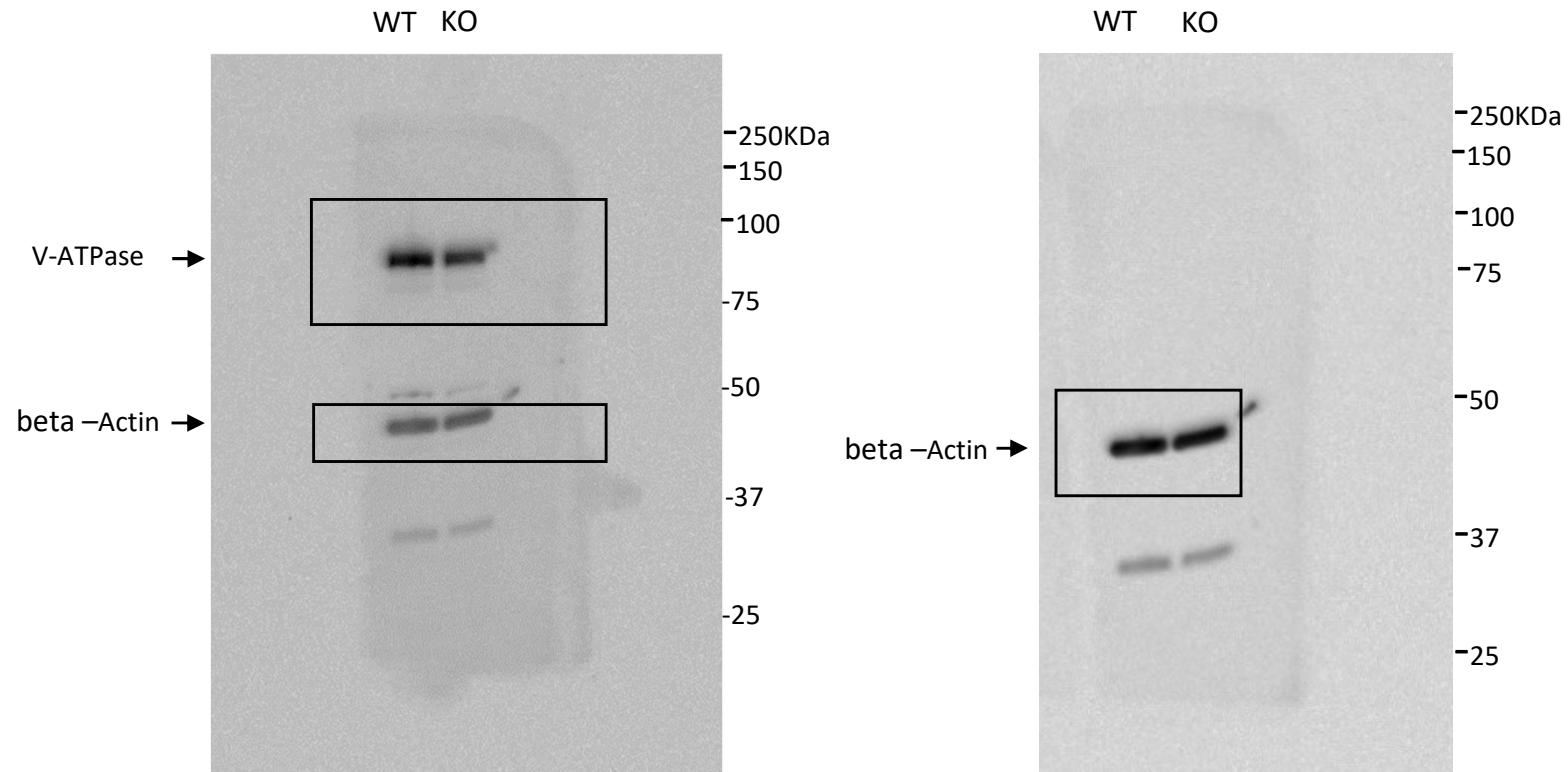

Blot to V-ATPase Ab (93 Kd)  
after blotting to beta-Actin  
Ab and CTSK Ab. Other  
Bands are CTSK.

Blot to beta-Actin Ab after blotting to CTSK Ab. Other  
Bands are CTSK.

SM3

## Original Blot Images for Figure 4B

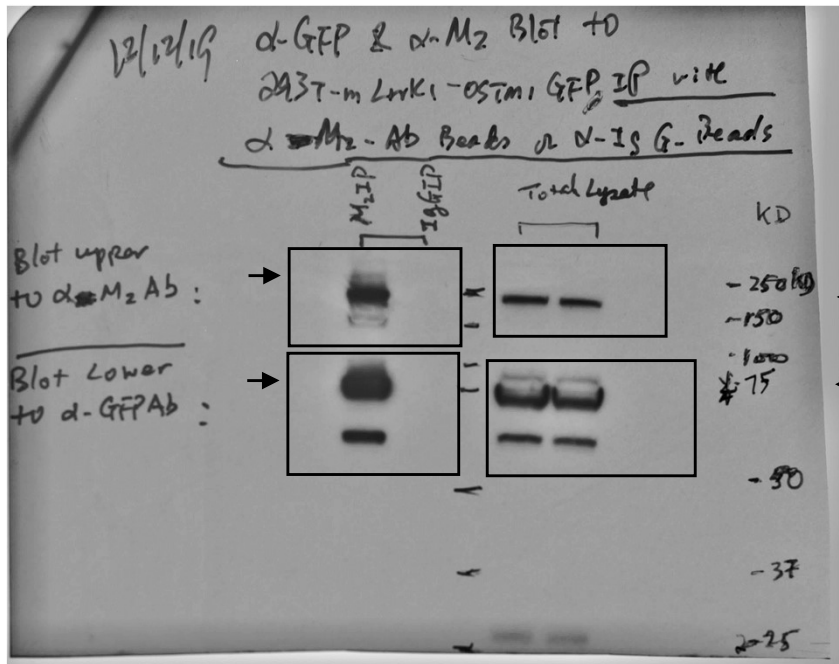

Blot to M2 Flag ab to detect LRRK1-Flag (upper panels)  
 Blot to GFP ab to detect OSTM1-GFP (lower panel)  
 Exposed to X-ray film for 1 minute

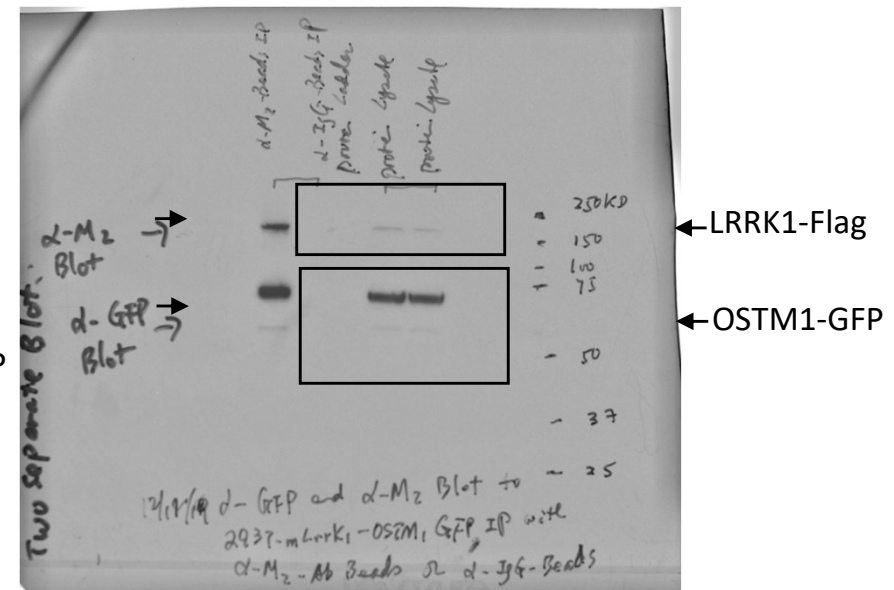

Blot to M2 Flag ab to detect LRRK1-Flag (upper panels)  
 Blot to GFP ab to detect OSTM1-GFP (lower panel)  
 Exposed to X-ray film for 10 seconds

SM4

## Original Blot Images for Figure 4C

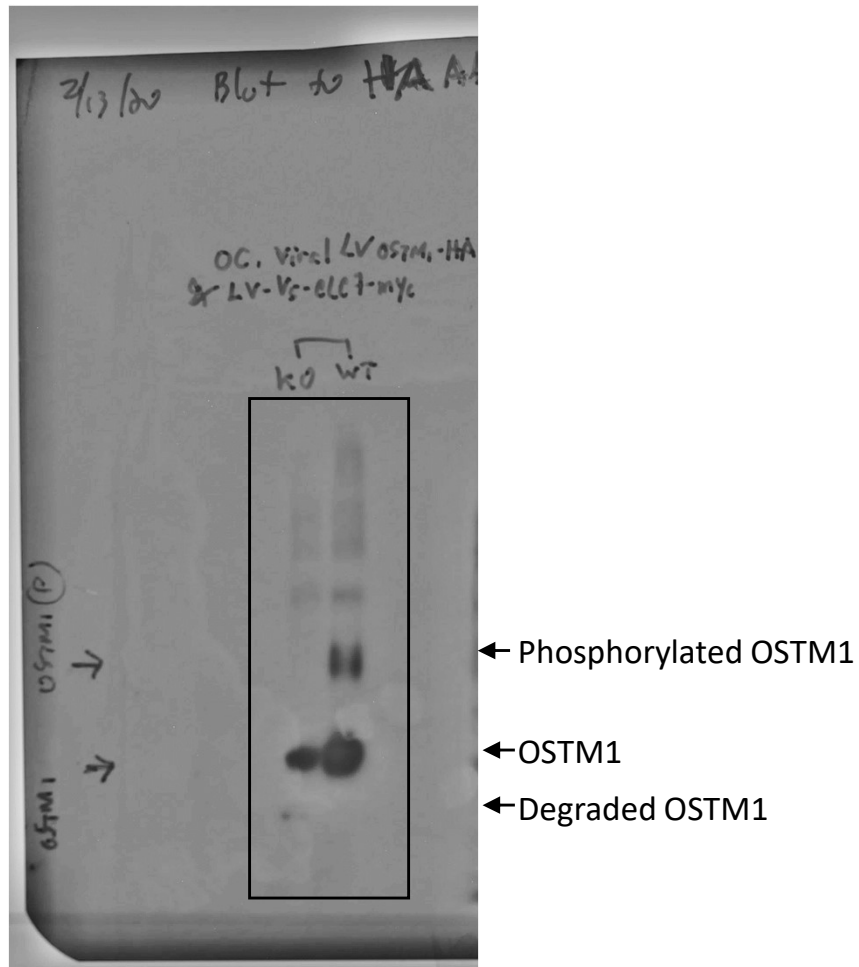

Blot to HA antibody to detect OSTM1-HA fusion protein  
(No protein size marker was used on Phos-tag SDS-PAGE gel)

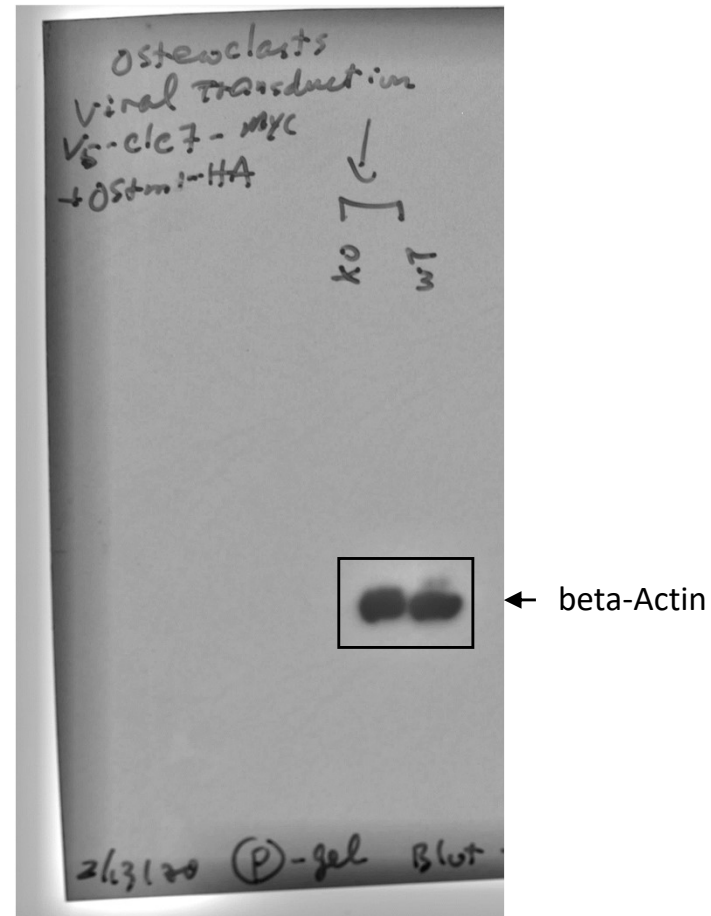

Blot to beta-Actin Ab  
(No protein size marker was used on Phos-tag SDS-PAGE gel)

SM5

# Original Blot Images for Figure 5A

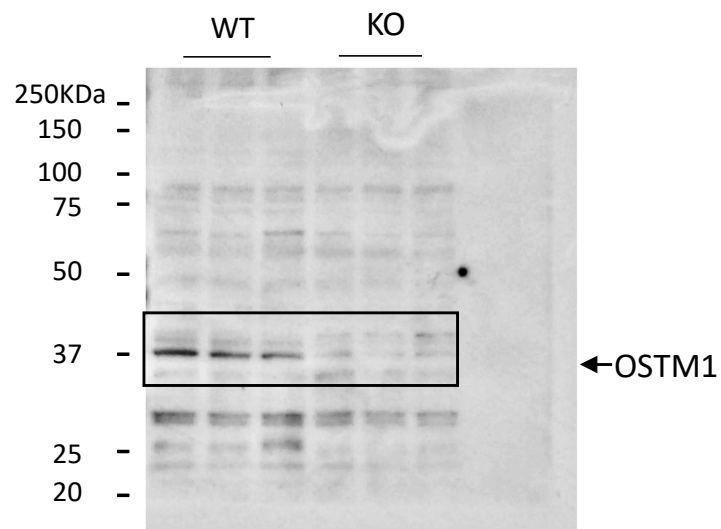

Blot to Ostm1 Ab

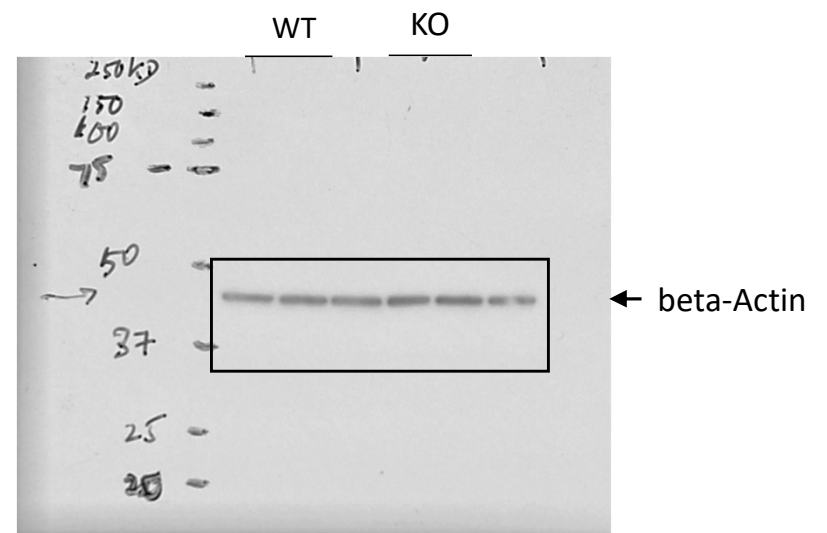

Blot to beta-Actin Ab
